# Supplementary material
Source: PubMed Central journal article supplement (PMC3383807)

# Supplemental Figure 1

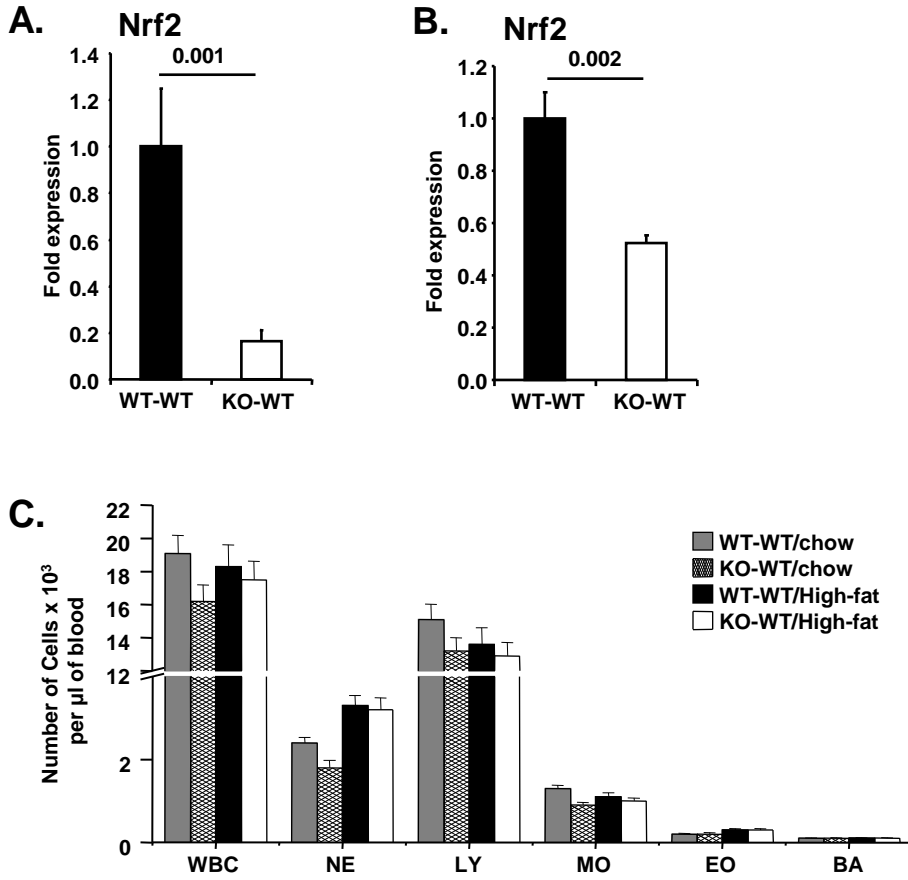

# Supplemental Figure 2

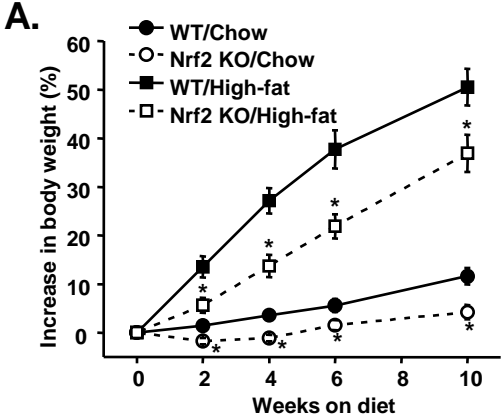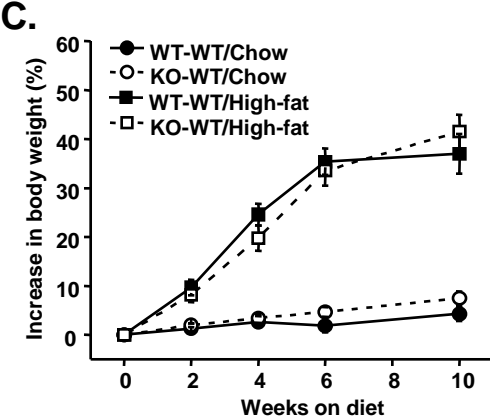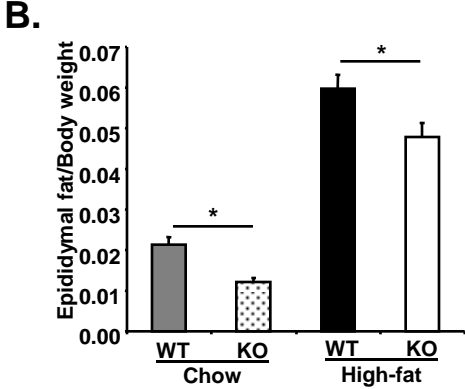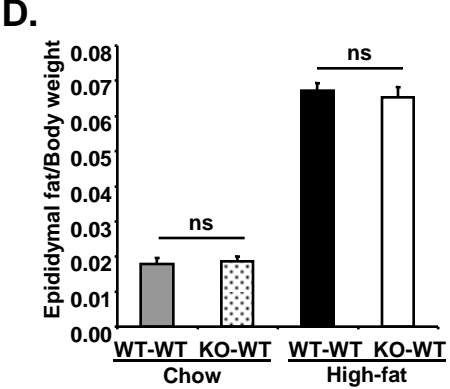

# Supplemental Figure 3

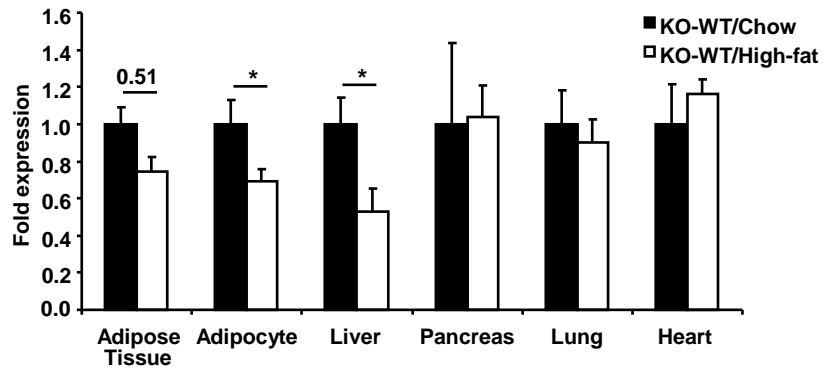

Supplement: NIHMS361858-supplement-01.pdf [file NIHMS361858-supplement-01.pdf]
